# Supplementary material
Source: publisher figshare collection journal article supplement (https://tandf.figshare.com/ndownloader/files/17471918)
Supplement: Supplementary file 1 [file 17471918]

## Sheet: Machine-Learning-Statistics
	5-folds Cross-Validation														Leave-One-Out
Confusion Matrix														Confusion Matrix
True 0	38	36	45	45	42	41	37	46	39	35	34	39		True 0	41	43	45	46	45	49	41	44	43	37	41	31
False 1	23	25	16	16	19	20	24	15	22	26	27	22		False 1	20	18	16	15	16	12	20	17	18	24	20	30
False 0	16	27	16	16	20	16	19	21	16	20	28	25		False 0	24	14	14	14	15	18	23	19	14	18	23	34
True 1	45	34	45	45	41	45	42	40	45	41	33	36		True 1	37	47	47	47	46	43	38	42	47	43	38	27
	CT	KNN	SVMLI	SVMGA	SVMCU	ENSGB	ENSLB	ENSRF	ENSSD	ENSKNN	RLI	LR			CT	KNN	SVMLI	SVMGA	SVMCU	ENSGB	ENSLB	ENSRF	ENSSD	ENSKNN	RLI	LR
Molecules	Statistics	Statistics	Statistics	Statistics	Statistics	Statistics	Statistics	Statistics	Statistics	Statistics	Statistics	Statistics		Molecules	Statistics	Statistics	Statistics	Statistics	Statistics	Statistics	Statistics	Statistics	Statistics	Statistics	Statistics	Statistics
Class 0	61	61	61	61	61	61	61	61	61	61	61	61		Class 0	61	61	61	61	61	61	61	61	61	61	61	61
Class 1	61	61	61	61	61	61	61	61	61	61	61	61		Class 1	61	61	61	61	61	61	61	61	61	61	61	61
All	122	122	122	122	122	122	122	122	122	122	122	122		All	122	122	122	122	122	122	122	122	122	122	122	122
True Predicted														True Predicted
Class 0	38	36	45	45	42	41	37	46	39	35	34	39		Class 0	41	43	45	46	45	49	41	44	43	37	41	31
Class 1	45	34	45	45	41	45	42	40	45	41	33	36		Class 1	37	47	47	47	46	43	38	42	47	43	38	27
All	83	70	90	90	83	86	79	86	84	76	67	75		All	78	90	92	93	91	92	79	86	90	80	79	58
Accuracy	0.680328	0.57377	0.737705	0.737705	0.680328	0.704918	0.647541	0.704918	0.688525	0.622951	0.54918	0.614754		Accuracy	0.639344	0.737705	0.754098	0.762295	0.745902	0.754098	0.647541	0.704918	0.737705	0.655738	0.647541	0.47541
Sensitivity	0.737705	0.557377	0.737705	0.737705	0.672131	0.737705	0.688525	0.655738	0.737705	0.672131	0.540984	0.590164		Sensitivity	0.606557	0.770492	0.770492	0.770492	0.754098	0.704918	0.622951	0.688525	0.770492	0.704918	0.622951	0.442623
Specificity	0.622951	0.590164	0.737705	0.737705	0.688525	0.672131	0.606557	0.754098	0.639344	0.57377	0.557377	0.639344		Specificity	0.672131	0.704918	0.737705	0.754098	0.737705	0.803279	0.672131	0.721311	0.704918	0.606557	0.672131	0.508197
CCR	0.680328	0.57377	0.737705	0.737705	0.680328	0.704918	0.647541	0.704918	0.688525	0.622951	0.54918	0.614754		CCR	0.639344	0.737705	0.754098	0.762295	0.745902	0.754098	0.647541	0.704918	0.737705	0.655738	0.647541	0.47541
MCC	0.363054	0.14762	0.47541	0.47541	0.360704	0.41072	0.296078	0.411833	0.378886	0.2471	0.0983739	0.229786		MCC	0.27929	0.476435	0.50847	0.524661	0.491869	0.510673	0.295439	0.410057	0.476435	0.312993	0.295439	-0.0492864
Kappa	0.360656	0.147541	0.47541	0.47541	0.360656	0.409836	0.295082	0.409836	0.377049	0.245902	0.0983607	0.229508		Kappa	0.278689	0.47541	0.508197	0.52459	0.491803	0.508197	0.295082	0.409836	0.47541	0.311475	0.295082	-0.0491803
NER	0.680328	0.57377	0.737705	0.737705	0.680328	0.704918	0.647541	0.704918	0.688525	0.622951	0.54918	0.614754		NER	0.639344	0.737705	0.754098	0.762295	0.745902	0.754098	0.647541	0.704918	0.737705	0.655738	0.647541	0.47541
Youden	0.360656	0.147541	0.47541	0.47541	0.360656	0.409836	0.295082	0.409836	0.377049	0.245902	0.0983607	0.229508		Youden	0.278689	0.47541	0.508197	0.52459	0.491803	0.508197	0.295082	0.409836	0.47541	0.311475	0.295082	-0.0491803
Geometric Mean	0.677904	0.573536	0.737705	0.737705	0.680278	0.704155	0.646243	0.7032	0.686766	0.621006	0.549119	0.614262		Geometric Mean	0.638503	0.736976	0.75392	0.762251	0.745857	0.752493	0.647074	0.704727	0.736976	0.653891	0.647074	0.474278
auROC	0.696318	0.634238	0.802472	0.808385	0.742274	0.737167	0.722655	0.800994	0.770761	0.701559	0.611126	0.620532		auROC	0.645525	0.734211	0.832841	0.841709	0.807847	0.784735	0.723193	0.795754	0.836066	0.709755	0.684225	0.471379

## Sheet: RINH-Density
	Confusion Matrix
	True 0	50	56	53	52	49	49	49	48	48	48	48	48	50	50	50	50	49	50	49	49	49	48	49	51	52	49	50	50	50	50	50	50	48	49	50	49	50	49	50	50	51	50	50	50	52	52	52	52
	False 1	11	5	8	9	12	12	12	13	13	13	13	13	11	11	11	11	12	11	12	12	12	13	12	10	9	12	11	11	11	11	11	11	13	12	11	12	11	12	11	11	10	11	11	11	9	9	9	9
	False 0	16	9	18	17	17	14	13	13	17	19	16	16	17	17	18	17	18	16	15	16	17	19	19	19	19	17	18	19	19	19	20	19	20	20	18	18	18	15	16	16	16	17	17	17	16	16	16	16
	True 1	45	52	43	44	44	47	48	48	44	42	45	45	44	44	43	44	43	45	46	45	44	42	42	42	42	44	43	42	42	42	41	42	41	41	43	43	43	46	45	45	45	44	44	44	45	45	45	45
		GTN	LTN	Threshold of Neighbors
	TN			1	2	3	4	5	6	7	8	9	10	11	12	13	14	15	16	17	18	19	20	21	22	23	24	25	26	27	28	29	30	31	32	33	34	35	36	37	38	39	40	41	42	43	44	45	46
	Molecules
	Class 0	61	61	61	61	61	61	61	61	61	61	61	61	61	61	61	61	61	61	61	61	61	61	61	61	61	61	61	61	61	61	61	61	61	61	61	61	61	61	61	61	61	61	61	61	61	61	61	61
	Class 1	61	61	61	61	61	61	61	61	61	61	61	61	61	61	61	61	61	61	61	61	61	61	61	61	61	61	61	61	61	61	61	61	61	61	61	61	61	61	61	61	61	61	61	61	61	61	61	61
	All	122	122	122	122	122	122	122	122	122	122	122	122	122	122	122	122	122	122	122	122	122	122	122	122	122	122	122	122	122	122	122	122	122	122	122	122	122	122	122	122	122	122	122	122	122	122	122	122
	True Predicted
	Class 0	50	56	53	52	49	49	49	48	48	48	48	48	50	50	50	50	49	50	49	49	49	48	49	51	52	49	50	50	50	50	50	50	48	49	50	49	50	49	50	50	51	50	50	50	52	52	52	52
	Class 1	45	52	43	44	44	47	48	48	44	42	45	45	44	44	43	44	43	45	46	45	44	42	42	42	42	44	43	42	42	42	41	42	41	41	43	43	43	46	45	45	45	44	44	44	45	45	45	45
	All	95	108	96	96	93	96	97	96	92	90	93	93	94	94	93	94	92	95	95	94	93	90	91	93	94	93	93	92	92	92	91	92	89	90	93	92	93	95	95	95	96	94	94	94	97	97	97	97
	Accuracy	0.778689	0.885246	0.786885	0.786885	0.762295	0.786885	0.795082	0.786885	0.754098	0.737705	0.762295	0.762295	0.770492	0.770492	0.762295	0.770492	0.754098	0.778689	0.778689	0.770492	0.762295	0.737705	0.745902	0.762295	0.770492	0.762295	0.762295	0.754098	0.754098	0.754098	0.745902	0.754098	0.729508	0.737705	0.762295	0.754098	0.762295	0.778689	0.778689	0.778689	0.786885	0.770492	0.770492	0.770492	0.795082	0.795082	0.795082	0.795082
	Sensitivity	0.737705	0.852459	0.704918	0.721311	0.721311	0.770492	0.786885	0.786885	0.721311	0.688525	0.737705	0.737705	0.721311	0.721311	0.704918	0.721311	0.704918	0.737705	0.754098	0.737705	0.721311	0.688525	0.688525	0.688525	0.688525	0.721311	0.704918	0.688525	0.688525	0.688525	0.672131	0.688525	0.672131	0.672131	0.704918	0.704918	0.704918	0.754098	0.737705	0.737705	0.737705	0.721311	0.721311	0.721311	0.737705	0.737705	0.737705	0.737705
	Specificity	0.819672	0.918033	0.868852	0.852459	0.803279	0.803279	0.803279	0.786885	0.786885	0.786885	0.786885	0.786885	0.819672	0.819672	0.819672	0.819672	0.803279	0.819672	0.803279	0.803279	0.803279	0.786885	0.803279	0.836066	0.852459	0.803279	0.819672	0.819672	0.819672	0.819672	0.819672	0.819672	0.786885	0.803279	0.819672	0.803279	0.819672	0.803279	0.819672	0.819672	0.836066	0.819672	0.819672	0.819672	0.852459	0.852459	0.852459	0.852459
	CCR	0.778689	0.885246	0.786885	0.786885	0.762295	0.786885	0.795082	0.786885	0.754098	0.737705	0.762295	0.762295	0.770492	0.770492	0.762295	0.770492	0.754098	0.778689	0.778689	0.770492	0.762295	0.737705	0.745902	0.762295	0.770492	0.762295	0.762295	0.754098	0.754098	0.754098	0.745902	0.754098	0.729508	0.737705	0.762295	0.754098	0.762295	0.778689	0.778689	0.778689	0.786885	0.770492	0.770492	0.770492	0.795082	0.795082	0.795082	0.795082
	MCC	0.559259	0.772154	0.581639	0.578769	0.526361	0.574079	0.590243	0.57377	0.509293	0.477726	0.525226	0.525226	0.54362	0.54362	0.528079	0.54362	0.510673	0.559259	0.558052	0.54215	0.526361	0.477726	0.495074	0.530395	0.548403	0.526361	0.528079	0.512624	0.512624	0.512624	0.497245	0.512624	0.462069	0.479552	0.528079	0.510673	0.528079	0.558052	0.559259	0.559259	0.576566	0.54362	0.54362	0.54362	0.594089	0.594089	0.594089	0.594089
	Kappa	0.557377	0.770492	0.57377	0.57377	0.52459	0.57377	0.590164	0.57377	0.508197	0.47541	0.52459	0.52459	0.540984	0.540984	0.52459	0.540984	0.508197	0.557377	0.557377	0.540984	0.52459	0.47541	0.491803	0.52459	0.540984	0.52459	0.52459	0.508197	0.508197	0.508197	0.491803	0.508197	0.459016	0.47541	0.52459	0.508197	0.52459	0.557377	0.557377	0.557377	0.57377	0.540984	0.540984	0.540984	0.590164	0.590164	0.590164	0.590164
	NER	0.778689	0.885246	0.786885	0.786885	0.762295	0.786885	0.795082	0.786885	0.754098	0.737705	0.762295	0.762295	0.770492	0.770492	0.762295	0.770492	0.754098	0.778689	0.778689	0.770492	0.762295	0.737705	0.745902	0.762295	0.770492	0.762295	0.762295	0.754098	0.754098	0.754098	0.745902	0.754098	0.729508	0.737705	0.762295	0.754098	0.762295	0.778689	0.778689	0.778689	0.786885	0.770492	0.770492	0.770492	0.795082	0.795082	0.795082	0.795082
	Youden	0.557377	0.770492	0.57377	0.57377	0.52459	0.57377	0.590164	0.57377	0.508197	0.47541	0.52459	0.52459	0.540984	0.540984	0.52459	0.540984	0.508197	0.557377	0.557377	0.540984	0.52459	0.47541	0.491803	0.52459	0.540984	0.52459	0.52459	0.508197	0.508197	0.508197	0.491803	0.508197	0.459016	0.47541	0.52459	0.508197	0.52459	0.557377	0.557377	0.557377	0.57377	0.540984	0.540984	0.540984	0.590164	0.590164	0.590164	0.590164
	Geometric Mean	0.777609	0.884639	0.782604	0.784148	0.761193	0.786714	0.79504	0.786885	0.753385	0.736064	0.761898	0.761898	0.768921	0.768921	0.760133	0.768921	0.752493	0.777609	0.7783	0.769794	0.761193	0.736064	0.743692	0.758717	0.766119	0.761193	0.760133	0.751242	0.751242	0.751242	0.742245	0.751242	0.727248	0.734785	0.760133	0.752493	0.760133	0.7783	0.777609	0.777609	0.785347	0.768921	0.768921	0.768921	0.793009	0.793009	0.793009	0.793009
	auROC	0.927439	0.949745	0.943564	0.937382	0.925289	0.928514	0.928783	0.92932	0.930664	0.932814	0.926095	0.92932	0.932545	0.928514	0.925558	0.923945	0.92932	0.924483	0.925289	0.922064	0.924751	0.93147	0.931201	0.931201	0.930395	0.928514	0.930395	0.932545	0.933083	0.934157	0.934964	0.937651	0.937114	0.934964	0.93792	0.937651	0.939264	0.939532	0.941682	0.942757	0.943295	0.944907	0.944101	0.943564	0.94222	0.940607	0.939801	0.943564
	% Reliability	98.7539	86.35	1.66667	3.26316	4.78363	6.3246	7.82122	9.34594	10.9232	12.4222	13.9512	15.4778	17.0123	18.532	20.0561	21.546	23.0011	24.4938	26.0293	27.5937	29.1216	30.6341	32.1027	33.5438	35.0311	36.5226	38.0838	39.638	41.2007	42.7655	44.3571	45.9528	47.5336	49.1353	50.7446	52.3464	53.9458	55.4969	57.0286	58.5676	60.11	61.6435	63.1874	64.7239	66.2575	67.792	69.3406	70.9048
[truncated: 14 more columns]

## Sheet: RINH-Distance-TN
	Confusion Matrix
	True 0	51	54	53	52	53	53	53	53	53	53	53	53	52	52	52	52	52	52	52	52	52	52	51	51	51	51	51	51	51	51	51	51	51	51	51	51	51	51	51	51	51	51	51	51	51	51	51	51
	False 1	10	7	8	9	8	8	8	8	8	8	8	8	9	9	9	9	9	9	9	9	9	9	10	10	10	10	10	10	10	10	10	10	10	10	10	10	10	10	10	10	10	10	10	10	10	10	10	10
	False 0	17	14	18	18	17	17	17	15	16	16	16	16	16	16	16	16	17	17	17	17	16	16	16	16	16	16	16	17	17	17	17	18	18	18	18	18	18	18	18	18	18	18	18	18	18	18	18	18
	True 1	44	47	43	43	44	44	44	46	45	45	45	45	45	45	45	45	44	44	44	44	45	45	45	45	45	45	45	44	44	44	44	43	43	43	43	43	43	43	43	43	43	43	43	43	43	43	43	43
		GTN	LTN	Threshold of Neighbors
	TN			1	2	3	4	5	6	7	8	9	10	11	12	13	14	15	16	17	18	19	20	21	22	23	24	25	26	27	28	29	30	31	32	33	34	35	36	37	38	39	40	41	42	43	44	45	46
	Molecules
	Class 0	61	61	61	61	61	61	61	61	61	61	61	61	61	61	61	61	61	61	61	61	61	61	61	61	61	61	61	61	61	61	61	61	61	61	61	61	61	61	61	61	61	61	61	61	61	61	61	61
	Class 1	61	61	61	61	61	61	61	61	61	61	61	61	61	61	61	61	61	61	61	61	61	61	61	61	61	61	61	61	61	61	61	61	61	61	61	61	61	61	61	61	61	61	61	61	61	61	61	61
	All	122	122	122	122	122	122	122	122	122	122	122	122	122	122	122	122	122	122	122	122	122	122	122	122	122	122	122	122	122	122	122	122	122	122	122	122	122	122	122	122	122	122	122	122	122	122	122	122
	True Predicted
	Class 0	51	54	53	52	53	53	53	53	53	53	53	53	52	52	52	52	52	52	52	52	52	52	51	51	51	51	51	51	51	51	51	51	51	51	51	51	51	51	51	51	51	51	51	51	51	51	51	51
	Class 1	44	47	43	43	44	44	44	46	45	45	45	45	45	45	45	45	44	44	44	44	45	45	45	45	45	45	45	44	44	44	44	43	43	43	43	43	43	43	43	43	43	43	43	43	43	43	43	43
	All	95	101	96	95	97	97	97	99	98	98	98	98	97	97	97	97	96	96	96	96	97	97	96	96	96	96	96	95	95	95	95	94	94	94	94	94	94	94	94	94	94	94	94	94	94	94	94	94
	Accuracy	0.778689	0.827869	0.786885	0.778689	0.795082	0.795082	0.795082	0.811475	0.803279	0.803279	0.803279	0.803279	0.795082	0.795082	0.795082	0.795082	0.786885	0.786885	0.786885	0.786885	0.795082	0.795082	0.786885	0.786885	0.786885	0.786885	0.786885	0.778689	0.778689	0.778689	0.778689	0.770492	0.770492	0.770492	0.770492	0.770492	0.770492	0.770492	0.770492	0.770492	0.770492	0.770492	0.770492	0.770492	0.770492	0.770492	0.770492	0.770492
	Sensitivity	0.721311	0.770492	0.704918	0.704918	0.721311	0.721311	0.721311	0.754098	0.737705	0.737705	0.737705	0.737705	0.737705	0.737705	0.737705	0.737705	0.721311	0.721311	0.721311	0.721311	0.737705	0.737705	0.737705	0.737705	0.737705	0.737705	0.737705	0.721311	0.721311	0.721311	0.721311	0.704918	0.704918	0.704918	0.704918	0.704918	0.704918	0.704918	0.704918	0.704918	0.704918	0.704918	0.704918	0.704918	0.704918	0.704918	0.704918	0.704918
	Specificity	0.836066	0.885246	0.868852	0.852459	0.868852	0.868852	0.868852	0.868852	0.868852	0.868852	0.868852	0.868852	0.852459	0.852459	0.852459	0.852459	0.852459	0.852459	0.852459	0.852459	0.852459	0.852459	0.836066	0.836066	0.836066	0.836066	0.836066	0.836066	0.836066	0.836066	0.836066	0.836066	0.836066	0.836066	0.836066	0.836066	0.836066	0.836066	0.836066	0.836066	0.836066	0.836066	0.836066	0.836066	0.836066	0.836066	0.836066	0.836066
	CCR	0.778689	0.827869	0.786885	0.778689	0.795082	0.795082	0.795082	0.811475	0.803279	0.803279	0.803279	0.803279	0.795082	0.795082	0.795082	0.795082	0.786885	0.786885	0.786885	0.786885	0.795082	0.795082	0.786885	0.786885	0.786885	0.786885	0.786885	0.778689	0.778689	0.778689	0.778689	0.770492	0.770492	0.770492	0.770492	0.770492	0.770492	0.770492	0.770492	0.770492	0.770492	0.770492	0.770492	0.770492	0.770492	0.770492	0.770492	0.770492
	MCC	0.561084	0.660098	0.581639	0.563545	0.596694	0.596694	0.596694	0.627093	0.611842	0.611842	0.611842	0.611842	0.594089	0.594089	0.594089	0.594089	0.578769	0.578769	0.578769	0.578769	0.594089	0.594089	0.576566	0.576566	0.576566	0.576566	0.576566	0.561084	0.561084	0.561084	0.561084	0.545697	0.545697	0.545697	0.545697	0.545697	0.545697	0.545697	0.545697	0.545697	0.545697	0.545697	0.545697	0.545697	0.545697	0.545697	0.545697	0.545697
	Kappa	0.557377	0.655738	0.57377	0.557377	0.590164	0.590164	0.590164	0.622951	0.606557	0.606557	0.606557	0.606557	0.590164	0.590164	0.590164	0.590164	0.57377	0.57377	0.57377	0.57377	0.590164	0.590164	0.57377	0.57377	0.57377	0.57377	0.57377	0.557377	0.557377	0.557377	0.557377	0.540984	0.540984	0.540984	0.540984	0.540984	0.540984	0.540984	0.540984	0.540984	0.540984	0.540984	0.540984	0.540984	0.540984	0.540984	0.540984	0.540984
	NER	0.778689	0.827869	0.786885	0.778689	0.795082	0.795082	0.795082	0.811475	0.803279	0.803279	0.803279	0.803279	0.795082	0.795082	0.795082	0.795082	0.786885	0.786885	0.786885	0.786885	0.795082	0.795082	0.786885	0.786885	0.786885	0.786885	0.786885	0.778689	0.778689	0.778689	0.778689	0.770492	0.770492	0.770492	0.770492	0.770492	0.770492	0.770492	0.770492	0.770492	0.770492	0.770492	0.770492	0.770492	0.770492	0.770492	0.770492	0.770492
	Youden	0.557377	0.655738	0.57377	0.557377	0.590164	0.590164	0.590164	0.622951	0.606557	0.606557	0.606557	0.606557	0.590164	0.590164	0.590164	0.590164	0.57377	0.57377	0.57377	0.57377	0.590164	0.590164	0.57377	0.57377	0.57377	0.57377	0.57377	0.557377	0.557377	0.557377	0.557377	0.540984	0.540984	0.540984	0.540984	0.540984	0.540984	0.540984	0.540984	0.540984	0.540984	0.540984	0.540984	0.540984	0.540984	0.540984	0.540984	0.540984
	Geometric Mean	0.776572	0.825878	0.782604	0.775186	0.791652	0.791652	0.791652	0.809444	0.800598	0.800598	0.800598	0.800598	0.793009	0.793009	0.793009	0.793009	0.784148	0.784148	0.784148	0.784148	0.793009	0.793009	0.785347	0.785347	0.785347	0.785347	0.785347	0.776572	0.776572	0.776572	0.776572	0.767696	0.767696	0.767696	0.767696	0.767696	0.767696	0.767696	0.767696	0.767696	0.767696	0.767696	0.767696	0.767696	0.767696	0.767696	0.767696	0.767696
	auROC	0.936173	0.94437	0.95082	0.948401	0.943295	0.940339	0.938995	0.937651	0.937382	0.937114	0.937382	0.938726	0.940339	0.941414	0.941682	0.940876	0.941682	0.94222	0.942489	0.942489	0.94222	0.94222	0.942757	0.943564	0.943564	0.943026	0.943026	0.943564	0.943295	0.943564	0.943564	0.943564	0.943832	0.944101	0.944101	0.943832	0.944907	0.94437	0.943832	0.944101	0.943832	0.944101	0.944907	0.944907	0.945445	0.945445	0.945982	0.945982
	% Reliability	97.9142	95	1.66667	3.30473	4.89125	6.49009	8.09451	9.74872	11.3984	13.0325	14.6648	16.2974	17.9244	19.5614	21.1957	22.8198	24.436	26.0467	27.6532	29.2563	30.8949	32.5333	34.1597	35.7746	37.38	38.9782	40.5714	42.1559	43.7313	45.3008	46.8645	48.4214	49.9725	51.5215	53.1346	54.7489	56.359	57.9661	59.5795	61.2143	62.8575	64.5319	66.2074	67.8838	69.5613	71.239	72.9165	74.5931
[truncated: 14 more columns]

## Sheet: RINH-Distance-NH
	Confusion Matrix
	True 0	52	55	53	52	53	52	52	51	52	52	52	52	52	53	52	53	53	52	52	53	53	54	52	52	53	53	52	52	52	51	51	52	52	52	52	52	51	51	51	51	51	51	51	51	52	51	51	51
	False 1	9	6	8	9	8	9	9	10	9	9	9	9	9	8	9	8	8	9	9	8	8	7	9	9	8	8	9	9	9	10	10	9	9	9	9	9	10	10	10	10	10	10	10	10	9	10	10	10
	False 0	18	14	18	18	18	17	16	16	15	16	16	18	17	17	17	17	18	19	18	18	18	18	18	17	17	17	17	17	17	17	17	17	17	17	17	17	17	17	17	17	17	17	18	18	18	18	18	18
	True 1	43	47	43	43	43	44	45	45	46	45	45	43	44	44	44	44	43	42	43	43	43	43	43	44	44	44	44	44	44	44	44	44	44	44	44	44	44	44	44	44	44	44	43	43	43	43	43	43
		GTN	LTN	Threshold of Neighbors
	TN			1	2	3	4	5	6	7	8	9	10	11	12	13	14	15	16	17	18	19	20	21	22	23	24	25	26	27	28	29	30	31	32	33	34	35	36	37	38	39	40	41	42	43	44	45	46
	Molecules
	Class 0	61	61	61	61	61	61	61	61	61	61	61	61	61	61	61	61	61	61	61	61	61	61	61	61	61	61	61	61	61	61	61	61	61	61	61	61	61	61	61	61	61	61	61	61	61	61	61	61
	Class 1	61	61	61	61	61	61	61	61	61	61	61	61	61	61	61	61	61	61	61	61	61	61	61	61	61	61	61	61	61	61	61	61	61	61	61	61	61	61	61	61	61	61	61	61	61	61	61	61
	All	122	122	122	122	122	122	122	122	122	122	122	122	122	122	122	122	122	122	122	122	122	122	122	122	122	122	122	122	122	122	122	122	122	122	122	122	122	122	122	122	122	122	122	122	122	122	122	122
	True Predicted
	Class 0	52	55	53	52	53	52	52	51	52	52	52	52	52	53	52	53	53	52	52	53	53	54	52	52	53	53	52	52	52	51	51	52	52	52	52	52	51	51	51	51	51	51	51	51	52	51	51	51
	Class 1	43	47	43	43	43	44	45	45	46	45	45	43	44	44	44	44	43	42	43	43	43	43	43	44	44	44	44	44	44	44	44	44	44	44	44	44	44	44	44	44	44	44	43	43	43	43	43	43
	All	95	102	96	95	96	96	97	96	98	97	97	95	96	97	96	97	96	94	95	96	96	97	95	96	97	97	96	96	96	95	95	96	96	96	96	96	95	95	95	95	95	95	94	94	95	94	94	94
	Accuracy	0.778689	0.836066	0.786885	0.778689	0.786885	0.786885	0.795082	0.786885	0.803279	0.795082	0.795082	0.778689	0.786885	0.795082	0.786885	0.795082	0.786885	0.770492	0.778689	0.786885	0.786885	0.795082	0.778689	0.786885	0.795082	0.795082	0.786885	0.786885	0.786885	0.778689	0.778689	0.786885	0.786885	0.786885	0.786885	0.786885	0.778689	0.778689	0.778689	0.778689	0.778689	0.778689	0.770492	0.770492	0.778689	0.770492	0.770492	0.770492
	Sensitivity	0.704918	0.770492	0.704918	0.704918	0.704918	0.721311	0.737705	0.737705	0.754098	0.737705	0.737705	0.704918	0.721311	0.721311	0.721311	0.721311	0.704918	0.688525	0.704918	0.704918	0.704918	0.704918	0.704918	0.721311	0.721311	0.721311	0.721311	0.721311	0.721311	0.721311	0.721311	0.721311	0.721311	0.721311	0.721311	0.721311	0.721311	0.721311	0.721311	0.721311	0.721311	0.721311	0.704918	0.704918	0.704918	0.704918	0.704918	0.704918
	Specificity	0.852459	0.901639	0.868852	0.852459	0.868852	0.852459	0.852459	0.836066	0.852459	0.852459	0.852459	0.852459	0.852459	0.868852	0.852459	0.868852	0.868852	0.852459	0.852459	0.868852	0.868852	0.885246	0.852459	0.852459	0.868852	0.868852	0.852459	0.852459	0.852459	0.836066	0.836066	0.852459	0.852459	0.852459	0.852459	0.852459	0.836066	0.836066	0.836066	0.836066	0.836066	0.836066	0.836066	0.836066	0.852459	0.836066	0.836066	0.836066
	CCR	0.778689	0.836066	0.786885	0.778689	0.786885	0.786885	0.795082	0.786885	0.803279	0.795082	0.795082	0.778689	0.786885	0.795082	0.786885	0.795082	0.786885	0.770492	0.778689	0.786885	0.786885	0.795082	0.778689	0.786885	0.795082	0.795082	0.786885	0.786885	0.786885	0.778689	0.778689	0.786885	0.786885	0.786885	0.786885	0.786885	0.778689	0.778689	0.778689	0.778689	0.778689	0.778689	0.770492	0.770492	0.778689	0.770492	0.770492	0.770492
	MCC	0.563545	0.677987	0.581639	0.563545	0.581639	0.578769	0.594089	0.576566	0.609513	0.594089	0.594089	0.563545	0.578769	0.596694	0.578769	0.596694	0.581639	0.548403	0.563545	0.581639	0.581639	0.6	0.563545	0.578769	0.596694	0.596694	0.578769	0.578769	0.578769	0.561084	0.561084	0.578769	0.578769	0.578769	0.578769	0.578769	0.561084	0.561084	0.561084	0.561084	0.561084	0.561084	0.545697	0.545697	0.563545	0.545697	0.545697	0.545697
	Kappa	0.557377	0.672131	0.57377	0.557377	0.57377	0.57377	0.590164	0.57377	0.606557	0.590164	0.590164	0.557377	0.57377	0.590164	0.57377	0.590164	0.57377	0.540984	0.557377	0.57377	0.57377	0.590164	0.557377	0.57377	0.590164	0.590164	0.57377	0.57377	0.57377	0.557377	0.557377	0.57377	0.57377	0.57377	0.57377	0.57377	0.557377	0.557377	0.557377	0.557377	0.557377	0.557377	0.540984	0.540984	0.557377	0.540984	0.540984	0.540984
	NER	0.778689	0.836066	0.786885	0.778689	0.786885	0.786885	0.795082	0.786885	0.803279	0.795082	0.795082	0.778689	0.786885	0.795082	0.786885	0.795082	0.786885	0.770492	0.778689	0.786885	0.786885	0.795082	0.778689	0.786885	0.795082	0.795082	0.786885	0.786885	0.786885	0.778689	0.778689	0.786885	0.786885	0.786885	0.786885	0.786885	0.778689	0.778689	0.778689	0.778689	0.778689	0.778689	0.770492	0.770492	0.778689	0.770492	0.770492	0.770492
	Youden	0.557377	0.672131	0.57377	0.557377	0.57377	0.57377	0.590164	0.57377	0.606557	0.590164	0.590164	0.557377	0.57377	0.590164	0.57377	0.590164	0.57377	0.540984	0.557377	0.57377	0.57377	0.590164	0.557377	0.57377	0.590164	0.590164	0.57377	0.57377	0.57377	0.557377	0.557377	0.57377	0.57377	0.57377	0.57377	0.57377	0.557377	0.557377	0.557377	0.557377	0.557377	0.557377	0.540984	0.540984	0.557377	0.540984	0.540984	0.540984
	Geometric Mean	0.775186	0.83349	0.782604	0.775186	0.782604	0.784148	0.793009	0.785347	0.801772	0.793009	0.793009	0.775186	0.784148	0.791652	0.784148	0.791652	0.782604	0.766119	0.775186	0.782604	0.782604	0.789953	0.775186	0.784148	0.791652	0.791652	0.784148	0.784148	0.784148	0.776572	0.776572	0.784148	0.784148	0.784148	0.784148	0.784148	0.776572	0.776572	0.776572	0.776572	0.776572	0.776572	0.767696	0.767696	0.775186	0.767696	0.767696	0.767696
	auROC	0.931739	0.946788	0.95297	0.951357	0.949476	0.944907	0.941414	0.940607	0.938726	0.938726	0.941414	0.940607	0.943026	0.944907	0.94652	0.946788	0.945982	0.948938	0.948938	0.95082	0.949745	0.949207	0.949207	0.950282	0.949476	0.949745	0.950013	0.949745	0.950013	0.950282	0.950013	0.950013	0.948938	0.948401	0.948938	0.948938	0.94867	0.949207	0.948401	0.948132	0.948132	0.947863	0.947863	0.947595	0.948401	0.948938	0.948938	0.947863
	% Reliability	99.1198	94.61	1.66667	3.33112	4.99675	6.64675	8.19898	9.78504	11.3928	13.0008	14.6347	16.2711	17.9171	19.5441	21.1566	22.7568	24.3625	25.9882	27.6026	29.1908	30.7709	32.3521	33.9326	35.5412	37.1597	38.7815	40.4194	42.0842	43.7458	45.3967	47.0424	48.6784	50.3024	51.928	53.5508	55.1785	56.8182	58.4631	60.096	61.7286	63.3533	64.9778	66.6016	68.2252	69.8352	71.4417	73.0465	74.6703
[truncated: 14 more columns]

## Sheet: RINH-Distance-NHC
	Confusion Matrix
	True 0	53	56	54	51	50	50	50	50	50	50	50	50	50	50	50	50	51	50	51	53	52	53	54	53	53	54	54	54	53	54	54	54	55	55	55	55	55	55	55	55	56	55	55	56	55	55	55	55
	False 1	8	5	7	10	11	11	11	11	11	11	11	11	11	11	11	11	10	11	10	8	9	8	7	8	8	7	7	7	8	7	7	7	6	6	6	6	6	6	6	6	5	6	6	5	6	6	6	6
	False 0	18	13	17	17	16	15	15	16	16	15	14	14	15	15	16	16	17	19	18	17	17	18	18	20	19	19	18	19	19	19	19	19	19	19	19	19	19	19	19	19	19	19	20	20	20	20	20	20
	True 1	43	48	44	44	45	46	46	45	45	46	47	47	46	46	45	45	44	42	43	44	44	43	43	41	42	42	43	42	42	42	42	42	42	42	42	42	42	42	42	42	42	42	41	41	41	41	41	41
		GTN	LTN	Threshold of Neighbors
	TN			1	2	3	4	5	6	7	8	9	10	11	12	13	14	15	16	17	18	19	20	21	22	23	24	25	26	27	28	29	30	31	32	33	34	35	36	37	38	39	40	41	42	43	44	45	46
	Molecules
	Class 0	61	61	61	61	61	61	61	61	61	61	61	61	61	61	61	61	61	61	61	61	61	61	61	61	61	61	61	61	61	61	61	61	61	61	61	61	61	61	61	61	61	61	61	61	61	61	61	61
	Class 1	61	61	61	61	61	61	61	61	61	61	61	61	61	61	61	61	61	61	61	61	61	61	61	61	61	61	61	61	61	61	61	61	61	61	61	61	61	61	61	61	61	61	61	61	61	61	61	61
	All	122	122	122	122	122	122	122	122	122	122	122	122	122	122	122	122	122	122	122	122	122	122	122	122	122	122	122	122	122	122	122	122	122	122	122	122	122	122	122	122	122	122	122	122	122	122	122	122
	True Predicted
	Class 0	53	56	54	51	50	50	50	50	50	50	50	50	50	50	50	50	51	50	51	53	52	53	54	53	53	54	54	54	53	54	54	54	55	55	55	55	55	55	55	55	56	55	55	56	55	55	55	55
	Class 1	43	48	44	44	45	46	46	45	45	46	47	47	46	46	45	45	44	42	43	44	44	43	43	41	42	42	43	42	42	42	42	42	42	42	42	42	42	42	42	42	42	42	41	41	41	41	41	41
	All	96	104	98	95	95	96	96	95	95	96	97	97	96	96	95	95	95	92	94	97	96	96	97	94	95	96	97	96	95	96	96	96	97	97	97	97	97	97	97	97	98	97	96	97	96	96	96	96
	Accuracy	0.786885	0.852459	0.803279	0.778689	0.778689	0.786885	0.786885	0.778689	0.778689	0.786885	0.795082	0.795082	0.786885	0.786885	0.778689	0.778689	0.778689	0.754098	0.770492	0.795082	0.786885	0.786885	0.795082	0.770492	0.778689	0.786885	0.795082	0.786885	0.778689	0.786885	0.786885	0.786885	0.795082	0.795082	0.795082	0.795082	0.795082	0.795082	0.795082	0.795082	0.803279	0.795082	0.786885	0.795082	0.786885	0.786885	0.786885	0.786885
	Sensitivity	0.704918	0.786885	0.721311	0.721311	0.737705	0.754098	0.754098	0.737705	0.737705	0.754098	0.770492	0.770492	0.754098	0.754098	0.737705	0.737705	0.721311	0.688525	0.704918	0.721311	0.721311	0.704918	0.704918	0.672131	0.688525	0.688525	0.704918	0.688525	0.688525	0.688525	0.688525	0.688525	0.688525	0.688525	0.688525	0.688525	0.688525	0.688525	0.688525	0.688525	0.688525	0.688525	0.672131	0.672131	0.672131	0.672131	0.672131	0.672131
	Specificity	0.868852	0.918033	0.885246	0.836066	0.819672	0.819672	0.819672	0.819672	0.819672	0.819672	0.819672	0.819672	0.819672	0.819672	0.819672	0.819672	0.836066	0.819672	0.836066	0.868852	0.852459	0.868852	0.885246	0.868852	0.868852	0.885246	0.885246	0.885246	0.868852	0.885246	0.885246	0.885246	0.901639	0.901639	0.901639	0.901639	0.901639	0.901639	0.901639	0.901639	0.918033	0.901639	0.901639	0.918033	0.901639	0.901639	0.901639	0.901639
	CCR	0.786885	0.852459	0.803279	0.778689	0.778689	0.786885	0.786885	0.778689	0.778689	0.786885	0.795082	0.795082	0.786885	0.786885	0.778689	0.778689	0.778689	0.754098	0.770492	0.795082	0.786885	0.786885	0.795082	0.770492	0.778689	0.786885	0.795082	0.786885	0.778689	0.786885	0.786885	0.786885	0.795082	0.795082	0.795082	0.795082	0.795082	0.795082	0.795082	0.795082	0.803279	0.795082	0.786885	0.795082	0.786885	0.786885	0.786885	0.786885
	MCC	0.581639	0.71106	0.614876	0.561084	0.559259	0.575008	0.575008	0.559259	0.559259	0.575008	0.590879	0.590879	0.575008	0.575008	0.559259	0.559259	0.561084	0.512624	0.545697	0.596694	0.578769	0.581639	0.6	0.551765	0.566667	0.585206	0.6	0.585206	0.566667	0.585206	0.585206	0.585206	0.60404	0.60404	0.60404	0.60404	0.60404	0.60404	0.60404	0.60404	0.623192	0.60404	0.589506	0.608859	0.589506	0.589506	0.589506	0.589506
	Kappa	0.57377	0.704918	0.606557	0.557377	0.557377	0.57377	0.57377	0.557377	0.557377	0.57377	0.590164	0.590164	0.57377	0.57377	0.557377	0.557377	0.557377	0.508197	0.540984	0.590164	0.57377	0.57377	0.590164	0.540984	0.557377	0.57377	0.590164	0.57377	0.557377	0.57377	0.57377	0.57377	0.590164	0.590164	0.590164	0.590164	0.590164	0.590164	0.590164	0.590164	0.606557	0.590164	0.57377	0.590164	0.57377	0.57377	0.57377	0.57377
	NER	0.786885	0.852459	0.803279	0.778689	0.778689	0.786885	0.786885	0.778689	0.778689	0.786885	0.795082	0.795082	0.786885	0.786885	0.778689	0.778689	0.778689	0.754098	0.770492	0.795082	0.786885	0.786885	0.795082	0.770492	0.778689	0.786885	0.795082	0.786885	0.778689	0.786885	0.786885	0.786885	0.795082	0.795082	0.795082	0.795082	0.795082	0.795082	0.795082	0.795082	0.803279	0.795082	0.786885	0.795082	0.786885	0.786885	0.786885	0.786885
	Youden	0.57377	0.704918	0.606557	0.557377	0.557377	0.57377	0.57377	0.557377	0.557377	0.57377	0.590164	0.590164	0.57377	0.57377	0.557377	0.557377	0.557377	0.508197	0.540984	0.590164	0.57377	0.57377	0.590164	0.540984	0.557377	0.57377	0.590164	0.57377	0.557377	0.57377	0.57377	0.57377	0.590164	0.590164	0.590164	0.590164	0.590164	0.590164	0.590164	0.590164	0.606557	0.590164	0.57377	0.590164	0.57377	0.57377	0.57377	0.57377
	Geometric Mean	0.782604	0.849933	0.799086	0.776572	0.777609	0.786202	0.786202	0.777609	0.777609	0.786202	0.794702	0.794702	0.786202	0.786202	0.777609	0.777609	0.776572	0.751242	0.767696	0.791652	0.784148	0.782604	0.789953	0.764188	0.773451	0.780714	0.789953	0.780714	0.773451	0.780714	0.780714	0.780714	0.787909	0.787909	0.787909	0.787909	0.787909	0.787909	0.787909	0.787909	0.79504	0.787909	0.778473	0.785518	0.778473	0.778473	0.778473	0.778473
	auROC	0.937786	0.949476	0.953238	0.946788	0.948938	0.937382	0.940607	0.939264	0.939801	0.940339	0.939532	0.93792	0.941951	0.942757	0.944907	0.944907	0.94652	0.949476	0.950282	0.951357	0.952432	0.951088	0.951895	0.951626	0.951895	0.951626	0.951626	0.953238	0.954045	0.954313	0.954851	0.955388	0.95512	0.95512	0.955657	0.956463	0.957001	0.956463	0.957001	0.956463	0.957001	0.956732	0.957001	0.957001	0.957001	0.957001	0.956732	0.956463
	% Reliability	97.2188	93.01	1.66667	3.24647	4.72444	6.36167	7.97947	9.58565	11.2385	12.9031	14.5373	16.1477	17.7402	19.3386	20.9335	22.5238	24.1276	25.702	27.2481	28.7604	30.2984	31.8825	33.4666	35.0354	36.6022	38.1363	39.6024	41.1214	42.7203	44.3194	45.9133	47.5114	49.0965	50.6428	52.1946	53.7316	55.3014	56.8657	58.4367	60.0769	61.7201	63.3753	65.026	66.6661	68.3265	69.9801	71.6215	73.2587
[truncated: 14 more columns]

## Sheet: Twenty-Datasets
Dataset	232_ASBTi10d													Dataset	ROCK1
Algorithm	RINH								5 folds Cross-Validation		Leave-One-Out			Algorithm	RINH								5 folds Cross-Validation		Leave-One-Out
Kernel	Density		Distance-TN		Distance-NH		Distance-NHC							Kernel	Density		Distance-TN		Distance-NH		Distance-NHC
Function	LTN	GTN	LTN	GTN	LTN	GTN	LTN	GTN	Linear SVM	Random Forest	Linear SVM	Random Forest		Function	LTN	GTN	LTN	GTN	LTN	GTN	LTN	GTN	Linear SVM	Random Forest	Linear SVM	Random Forest
Modelability = 0.78														Modelability = 0.91
Molecules														Molecules
Class 0	116	116	116	116	116	116	116	116	116	116	116	116		Class 0	353	353	353	353	353	353	353	353	353	353	353	353
Class 1	116	116	116	116	116	116	116	116	116	116	116	116		Class 1	333	333	333	333	333	333	333	333	333	333	333	333
All	232	232	232	232	232	232	232	232	232	232	232	232		All	686	686	686	686	686	686	686	686	686	686	686	686
True Predicted														True Predicted
Class 0	103	90	98	93	97	93	95	62	93	97	94	104		Class 0	337	310	327	321	325	320	327	291	313	328	311	355
Class 1	110	105	109	108	112	108	114	111	101	97	98	103		Class 1	328	322	319	318	318	318	326	319	293	298	295	305
All	213	195	207	201	209	201	209	173	194	194	192	207		All	665	632	646	639	643	638	653	610	606	626	606	640
Statistic Parameters														Statistic Parameters
Accuracy	0.9181	0.8405	0.8922	0.8664	0.9009	0.8664	0.9009	0.7457	0.8362	0.8362	0.8276	0.8922		Accuracy	0.9694	0.9213	0.9417	0.9315	0.9373	0.93	0.9519	0.8892	0.8834	0.9125	0.8834	0.9329
Sensitivity	0.9483	0.9052	0.9397	0.931	0.9655	0.931	0.9828	0.9569	0.8707	0.8362	0.8448	0.8879		Sensitivity	0.985	0.967	0.958	0.955	0.955	0.955	0.979	0.958	0.8799	0.8949	0.8859	0.9159
Specificity	0.8879	0.7759	0.8448	0.8017	0.8362	0.8017	0.819	0.5345	0.8017	0.8362	0.8103	0.8966		Specificity	0.9547	0.8782	0.9263	0.9093	0.9207	0.9065	0.9263	0.8244	0.8867	0.9292	0.881	0.949
CCR	0.9181	0.8405	0.8922	0.8664	0.9009	0.8664	0.9009	0.7457	0.8362	0.8362	0.8276	0.8922		CCR	0.9698	0.9226	0.9422	0.9322	0.9378	0.9307	0.9527	0.8912	0.8833	0.912	0.8835	0.9325
MCC	0.8377	0.6868	0.788	0.739	0.8085	0.739	0.8127	0.5421	0.674	0.6724	0.6556	0.7845		MCC	0.9393	0.8465	0.8839	0.8641	0.8753	0.8613	0.9053	0.7868	0.7666	0.8251	0.7667	0.866
Kappa	0.8362	0.681	0.7845	0.7328	0.8017	0.7328	0.8017	0.4914	0.6724	0.6724	0.6552	0.7845		Kappa	0.9388	0.8429	0.8834	0.8631	0.8747	0.8602	0.9039	0.7791	0.7666	0.8248	0.7666	0.8657
Youden	0.8362	0.681	0.7845	0.7328	0.8017	0.7328	0.8017	0.4914	0.6724	0.6724	0.6552	0.7845		Youden	0.9397	0.8452	0.8843	0.8643	0.8756	0.8615	0.9053	0.7823	0.7666	0.8241	0.7669	0.8649
Geometric Mean	0.9176	0.838	0.891	0.864	0.8985	0.864	0.8971	0.7152	0.8355	0.8362	0.8274	0.8922		Geometric Mean	0.9697	0.9215	0.942	0.9319	0.9377	0.9304	0.9523	0.8887	0.8833	0.9119	0.8834	0.9323
auROC	0.9564	0.9294	0.9581	0.9176	0.9571	0.9061	0.9444	0.8881	0.9091	0.9206	0.9004	0.9465		auROC	0.9883	0.9672	0.987	0.9597	0.9867	0.9584	0.9855	0.9531	0.9338	0.9728	0.9373	0.9768
Reliability	0.8854	0.9745	0.952	0.9831	0.9593	0.9896	0.8257	0.9609	N/A	N/A	N/A	N/A		Reliability	0.9392	0.985	0.9885	0.9977	0.9922	0.9977	0.9577	0.9935	N/A	N/A	N/A	N/A
Dataset	321_MRP1													Dataset	TGFBR1
Algorithm	RINH								5 folds Cross-Validation		Leave-One-Out			Algorithm	RINH								5 folds Cross-Validation		Leave-One-Out
Kernel	Density		Distance-TN		Distance-NH		Distance-NHC							Kernel	Density		Distance-TN		Distance-NH		Distance-NHC
Function	LTN	GTN	LTN	GTN	LTN	GTN	LTN	GTN	Linear SVM	Random Forest	Linear SVM	Random Forest		Function	LTN	GTN	LTN	GTN	LTN	GTN	LTN	GTN	Linear SVM	Random Forest	Linear SVM	Random Forest
Modelability = 0.80														Modelability = 0.85
Molecules														Molecules
Class 0	85	85	85	85	85	85	85	85	85	85	85	85		Class 0	259	259	259	259	259	259	259	259	259	259	259	259
Class 1	95	95	95	95	95	95	95	95	95	95	95	95		Class 1	267	267	267	267	267	267	267	267	267	267	267	267
All	180	180	180	180	180	180	180	180	180	180	180	180		All	526	526	526	526	526	526	526	526	526	526	526	526
True Predicted														True Predicted
Class 0	76	71	72	71	71	71	75	71	70	72	71	69		Class 0	232	205	220	212	223	212	226	207	202	222	194	224
Class 1	88	79	85	71	85	81	85	77	84	82	83	81		Class 1	258	243	244	241	243	241	252	236	234	223	238	229
All	144	150	157	152	156	152	160	148	254	154	154	150		All	490	448	464	453	466	453	478	443	436	445	432	453
Statistic Parameters														Statistic Parameters
Accuracy	0.9111	0.8333	0.8722	0.8444	0.8667	0.8444	0.8889	0.8222	0.8556	0.8556	0.8556	0.8333		Accuracy	0.9316	0.8517	0.8821	0.8612	0.8859	0.8612	0.9087	0.8422	0.8289	0.846	0.8213	0.8612
Sensitivity	0.9263	0.8316	0.8947	0.8526	0.8947	0.8526	0.8947	0.8105	0.8842	0.8632	0.8737	0.8526		Sensitivity	0.9663	0.9101	0.9139	0.9026	0.9101	0.9026	0.9438	0.8839	0.8764	0.8352	0.8914	0.8577
Specificity	0.8941	0.8353	0.8471	0.8353	0.8353	0.8353	0.8824	0.8353	0.8235	0.8471	0.8353	0.8118		Specificity	0.8958	0.7915	0.8494	0.8185	0.861	0.8185	0.8726	0.7992	0.7799	0.8571	0.749	0.8649
CCR	0.9102	0.8334	0.8709	0.844	0.865	0.844	0.8885	0.8229	0.8539	0.8551	0.8545	0.8322		CCR	0.931	0.8508	0.8816	0.8606	0.8856	0.8606	0.9082	0.8416	0.8282	0.8462	0.8202	0.8613
MCC	0.8217	0.6662	0.7436	0.6879	0.7326	0.6879	0.7771	0.6449	0.7102	0.7102	0.71	0.6654		MCC	0.865	0.7075	0.7654	0.7244	0.7725	0.7244	0.8192	0.6862	0.66	0.6923	0.6479	0.7225
Kappa	0.8215	0.666	0.7432	0.6879	0.7318	0.6879	0.7771	0.6442	0.7095	0.7102	0.7099	0.6652		Kappa	0.8629	0.7028	0.764	0.722	0.7717	0.722	0.8173	0.684	0.6572	0.6921	0.6418	0.7224
Youden	0.8204	0.6669	0.7415	0.6879	0.73	0.6879	0.7771	0.6458	0.7077	0.7102	0.709	0.6644		Youden	0.862	0.7016	0.7633	0.7212	0.7711	0.7212	0.8164	0.6831	0.6563	0.6923	0.6404	0.7225
Geometric Mean	0.9101	0.8334	0.8706	0.8439	0.8645	0.8439	0.8885	0.8228	0.8533	0.8551	0.8543	0.8319		Geometric Mean	0.9304	0.8487	0.8811	0.8595	0.8852	0.8595	0.9075	0.8405	0.8268	0.8461	0.8171	0.8613
auROC	0.9694	0.9186	0.9624	0.9124	0.9616	0.9133	0.9609	0.9154	0.9012	0.9211	0.8987	0.9254		auROC	0.9547	0.9259	0.9484	0.92	0.9503	0.9153	0.949	0.9172	0.8947	0.9271	0.8919	0.9353
Reliability	0.9055	0.9824	0.9734	0.9986	0.9798	0.9832	0.9415	0.9901	N/A	N/A	N/A	N/A		Reliability	0.9078	0.9851	0.9796	0.9939	0.9796	0.9983	0.9663	0.9915	N/A	N/A	N/A	N/A
Dataset	RAF1													Dataset	244_BSEPi100
Algorithm	RINH								5 folds Cross-Validation		Leave-One-Out			Algorithm	RINH								5 folds Cross-Validation		Leave-One-Out
Kernel	Density		Distance-TN		Distance-NH		Distance-NHC							Kernel	Density		Distance-TN		Distance-NH		Distance-NHC
Function	LTN	GTN	LTN	GTN	LTN	GTN	LTN	GTN	Linear SVM	Random Forest	Linear SVM	Random Forest		Function	LTN	GTN	LTN	GTN	LTN	GTN	LTN	GTN	Linear SVM	Random Forest	Linear SVM	Random Forest
Modelability = 0.88														Modelability = 0.85
Molecules														Molecules
Class 0	245	245	245	245	245	245	245	245	245	245	245	245		Class 0	516	516	516	516	516	516	516	516	516	516	516	516
Class 1	252	252	252	252	252	252	252	252	252	252	252	252		Class 1	163	163	163	163	163	163	163	163	163	163	163	163
All	497	497	497	497	497	497	497	497	497	497	497	497		All	679	679	679	679	679	679	679	679	679	679	679	679
True Predicted														True Predicted
Class 0	232	213	227	217	230	218	231	213	211	212	213	219		Class 0	512	509	499	485	481	466	500	482	474	486	475	482
Class 1	248	229	234	231	236	230	237	231	226	228	232	231		Class 1	115	45	107	88	123	106	115	70	103	100	103	105
All	480	442	461	448	466	448	468	444	437	440	445	450		All	627	554	606	573	604	572	615	552	577	586	578	587
Statistic Parameters														Statistic Parameters
Accuracy	0.9658	0.8893	0.9276	0.9014	0.9376	0.9014	0.9416	0.8934	0.8793	0.8853	0.8954	0.9054		Accuracy	0.9234	0.8159	0.8925	0.8439	0.8895	0.8424	0.9057	0.813	0.8498	0.863	0.8513	0.8645
Sensitivity	0.9841	0.9087	0.9286	0.9167	0.9365	0.9127	0.9405	0.9167	0.8968	0.9048	0.9206	0.9167		Sensitivity	0.7055	0.2761	0.6564	0.5399	0.7546	0.6503	0.7055	0.4294	0.6319	0.6135	0.6319	0.6442
Specificity	0.9469	0.8694	0.9265	0.8557	0.9388	0.8898	0.9429	0.8694	0.8612	0.8653	0.8694	0.8939		Specificity	0.9922	0.9864	0.9671	0.9399	0.9322	0.9031	0.969	0.9341	0.9186	0.9419	0.9205	0.9341
CCR	0.9655	0.8891	0.9276	0.9012	0.9376	0.9012	0.9417	0.893	0.879	0.885	0.895	0.9053		CCR	0.8489	0.6313	0.8117	0.7399	0.8434	0.7767	0.8373	0.6818	0.7753	0.7777	0.7762	0.7891
MCC	0.9322	0.779	0.8551	0.803	0.8752	0.8029	0.8833	0.7873	0.7588	0.771	0.7915	0.8109		MCC	0.7839	0.4216	0.6893	0.539	0.6942	0.5619	0.7301	0.4312	0.5738	0.6029	0.5772	0.6121
Kappa	0.9315	0.7785	0.8551	0.8027	0.8752	0.8027	0.8833	0.7865	0.7584	0.7705	0.7906	0.8108		Kappa	0.7688	0.3422	0.6791	0.5286	0.6941	0.5617	0.7231	0.4149	0.5721	0.5967	0.5754	0.6089
Youden	0.9311	0.7781	0.8551	0.8024	0.8753	0.8025	0.8833	0.7861	0.758	0.7701	0.79	0.8105		Youden	0.6978	0.2625	0.6235	0.4798	0.6868	0.5534	0.6745	0.3636	0.5505	0.5554	0.5524	0.5783
Geometric Mean	0.9654	0.8888	0.9276	0.9011	0.9376	0.9012	0.9417	0.8927	0.8788	0.8848	0.8946	0.9052		Geometric Mean	0.8367	0.5219	0.7968	0.7124	0.8387	0.7664	0.8268	0.6334	0.7619	0.7602	0.7627	0.7757
auROC	0.9866	0.9603	0.9817	0.9576	0.9828	0.9519	0.9822	0.9536	0.9461	0.9612	0.9494	0.9669		auROC	0.9949	0.9923	0.9818	0.9694	0.9656	0.9503	0.9816	0.9674	0.9009	0.9114	0.908	0.9126
Reliability	0.922	0.9875	0.9751	0.9899	0.9731	0.9943	0.9559	0.9923	N/A	N/A	N/A	N/A		Reliability	0.8779	0.9733	0.9532	0.9919	0.9732	0.9949	0.9075	0.9901	N/A	N/A	N/A	N/A
Dataset	SGK1													Dataset	342_MRP4x
Algorithm	RINH								5 folds Cross-Validation		Leave-One-Out			Algorithm	RINH								5 folds Cross-Validation		Leave-One-Out
Kernel	Density		Distance-TN		Distance-NH		Distance-NHC							Kernel	Density		Distance-TN		Distance-NH		Distance-NHC
Function	LTN	GTN	LTN	GTN	LTN	GTN	LTN	GTN	Linear SVM	Random Forest	Linear SVM	Random Forest		Function	LTN	GTN	LTN	GTN	LTN	GTN	LTN	GTN	Linear SVM	Random Forest	Linear SVM	Random Forest
Modelability = 0.74														Modelability = 0.67
Molecules														Molecules
Class 0	93	93	93	93	93	93	93	93	93	93	93	93		Class 0	61	61	61	61	61	61	61	61	61	61	61	61
Class 1	93	93	93	93	93	93	93	93	93	93	93	93		Class 1	61	61	61	61	61	61	61	61	61	61	61	61
All	186	186	186	186	186	186	186	186	186	186	186	186		All	122	122	122	122	122	122	122	122	122	122	122	122
True Predicted														True Predicted
Class 0	85	77	84	80	84	82	86	69	60	73	63	76		Class 0	56	50	54	51	55	52	56	53	45	46	45	44
Class 1	91	81	80	76	80	75	84	72	75	71	69	77		Class 1	52	45	47	44	47	43	48	43	45	40	47	42
All	176	158	164	156	164	157	170	141	135	144	132	153		All	108	95	101	95	102	95	104	96	90	86	92	86
Statistic Parameters														Statistic Parameters
Accuracy	0.9462	0.8495	0.8817	0.8387	0.8817	0.8441	0.914	0.7581	0.7258	0.7742	0.7097	0.8226		Accuracy	0.8852	0.7787	0.8279	0.7787	0.8361	0.7787	0.8525	0.7869	0.7377	0.7049	0.7541	0.7049
Sensitivity	0.9785	0.871	0.8602	0.8172	0.8602	0.8065	0.9032	0.7742	0.8065	0.7634	0.7419	0.828		Sensitivity	0.8525	0.7377	0.7705	0.7213	0.7705	0.7049	0.7869	0.7049	0.7377	0.6557	0.7705	0.6885
Specificity	0.914	0.828	0.9032	0.8602	0.9032	0.8817	0.9247	0.7419	0.6452	0.7849	0.6774	0.8172		Specificity	0.918	0.8197	0.8852	0.8361	0.9016	0.8525	0.918	0.8689	0.7377	0.7541	0.7377	0.7213
CCR	0.9462	0.8495	0.8817	0.8387	0.8817	0.8441	0.914	0.7581	0.7258	0.7742	0.7097	0.8226		CCR	0.8852	0.7787	0.8279	0.7787	0.8361	0.7787	0.8525	0.7869	0.7377	0.7049	0.7541	0.7049
MCC	0.8943	0.6996	0.7641	0.678	0.7641	0.6901	0.8281	0.5164	0.4576	0.5485	0.4202	0.6452		MCC	0.7722	0.5593	0.6601	0.5611	0.678	0.5635	0.7111	0.5816	0.4754	0.4118	0.5085	0.4101
Kappa	0.8925	0.6989	0.7634	0.8774	0.7634	0.6882	0.828	0.5161	0.4516	0.5484	0.4194	0.6452		Kappa	0.7705	0.5574	0.6557	0.5574	0.6721	0.5574	0.7049	0.5738	0.4754	0.4098	0.5082	0.4098
Youden	0.8925	0.6989	0.7634	0.6774	0.7634	0.6882	0.828	0.5161	0.4516	0.5484	0.4194	0.6452		Youden	0.7705	0.5574	0.6557	0.5574	0.6721	0.5574	0.7049	0.5738	0.4754	0.4098	0.5082	0.4098
Geometric Mean	0.9457	0.8492	0.8815	0.8384	0.8815	0.8432	0.9136	0.7579	0.7213	0.7741	0.7089	0.8226		Geometric Mean	0.8846	0.7776	0.8259	0.7766	0.8335	0.7752	0.8499	0.7826	0.7377	0.7032	0.7539	0.7047
auROC	0.9535	0.9313	0.9554	0.944	0.9568	0.939	0.9579	0.9253	0.8034	0.883	0.8135	0.9008		auROC	0.9503	0.9274	0.9444	0.9362	0.9468	0.9317	0.9495	0.9378	0.8025	0.801	0.8328	0.7958
Reliability	0.864	0.9652	0.9685	0.9955	0.9795	0.9937	0.8682	0.9728	N/A	N/A	N/A	N/A		Reliability	0.874	0.9875	0.95	0.9791	0.9461	0.9912	0.9301	0.9722	N/A	N/A	N/A	N/A
Dataset	241_BCRPi10													Dataset	RPS6KB1
Algorithm	RINH								5 folds Cross-Validation		Leave-One-Out			Algorithm	RINH								5 folds Cross-Validation		Leave-One-Out
Kernel	Density		Distance-TN		Distance-NH		Distance-NHC							Kernel	Density		Distance-TN		Distance-NH		Distance-NHC
Function	LTN	GTN	LTN	GTN	LTN	GTN	LTN	GTN	Linear SVM	Random Forest	Linear SVM	Random Forest		Function	LTN	GTN	LTN	GTN	LTN	GTN	LTN	GTN	Linear SVM	Random Forest	Linear SVM	Random Forest
Modelability = 0.74														Modelability = 0.85
Molecules														Molecules
Class 0	217	217	217	217	217	217	217	217	217	217	217	217		Class 0	383	383	383	383	383	383	383	383	383	383	383	383
Class 1	178	178	178	178	178	178	178	178	178	178	178	178		Class 1	379	379	379	379	379	379	379	379	379	379	379	379
All	395	395	395	395	395	395	395	395	395	395	395	395		All	762	762	762	762	762	762	762	762	762	762	762	762
True Predicted														True Predicted
Class 0	204	175	191	168	184	165	187	138	175	178	172	182		Class 0	360	316	337	328	339	329	349	319	309	344	316	342
Class 1	165	142	153	142	157	145	161	140	134	130	135	123		Class 1	364	333	349	342	347	341	360	344	299	334	302	335
All	369	317	344	310	341	310	348	278	309	308	307	305		All	724	649	686	670	686	670	709	663	608	678	618	677
Statistic Parameters														Statistic Parameters
Accuracy	0.9342	0.8025	0.8709	0.7848	0.8633	0.7848	0.881	0.7038	0.7823	0.7797	0.7772	0.7722		Accuracy	0.9501	0.8517	0.9003	0.8793	0.9003	0.8793	0.9304	0.8701	0.7979	0.8898	0.811	0.8885
Sensitivity	0.927	0.7978	0.8596	0.7978	0.882	0.8146	0.9045	0.7865	0.7528	0.7303	0.7584	0.691		Sensitivity	0.9604	0.8786	0.9208	0.9024	0.9156	0.8997	0.9499	0.9077	0.7889	0.8813	0.7968	0.8839
Specificity	0.9401	0.8065	0.8802	0.7742	0.8479	0.7604	0.8618	0.6359	0.8065	0.8203	0.7926	0.8387		Specificity	0.9399	0.8251	0.8799	0.8564	0.8851	0.859	0.9112	0.8329	0.8068	0.8982	0.8251	0.893
CCR	0.9335	0.8021	0.8699	0.786	0.865	0.7875	0.8831	0.7112	0.7796	0.7753	0.7755	0.7649		CCR	0.9502	0.8518	0.9004	0.8794	0.9003	0.8794	0.9305	0.8703	0.7979	0.8897	0.8109	0.8884
MCC	0.8671	0.6027	0.7394	0.5695	0.7269	0.5722	0.7629	0.4229	0.5599	0.5537	0.5505	0.538		MCC	0.9005	0.7046	0.8013	0.7594	0.8009	0.7592	0.8616	0.7424	0.5958	0.7796	0.6222	0.7769
Kappa	0.8671	0.6024	0.7394	0.5682	0.7256	0.5695	0.7612	0.4139	0.5598	0.5531	0.5505	0.5351		Kappa	0.9003	0.7035	0.8006	0.7586	0.8006	0.7586	0.8609	0.7403	0.5958	0.7795	0.622	0.7769
Youden	0.8671	0.6042	0.7397	0.5719	0.7299	0.575	0.7662	0.4225	0.5593	0.5506	0.5511	0.5297		Youden	0.9004	0.7037	0.8007	0.7588	0.8007	0.7587	0.8611	0.7405	0.5857	0.7794	0.6219	0.7769
Geometric Mean	0.9335	0.8021	0.8698	0.7859	0.8648	0.787	0.8829	0.7072	0.7792	0.774	0.7753	0.7613		Geometric Mean	0.9501	0.8514	0.9001	0.8791	0.9002	0.8791	0.9303	0.8695	0.7978	0.8897	0.8108	0.8884
auROC	0.9613	0.9065	0.942	0.9019	0.9333	0.8831	0.9357	0.8727	0.8416	0.8737	0.8425	0.867		auROC	0.9734	0.9445	0.9682	0.9374	0.9689	0.9329	0.9685	0.9321	0.858	0.9561	0.8702	0.9505
Reliability	0.8393	0.9379	0.9334	0.9788	0.945	0.9865	0.8473	0.9687	N/A	N/A	N/A	N/A		Reliability	0.8953	0.9815	0.9707	0.9941	0.9792	0.9948	0.9687	0.9856	N/A	N/A	N/A	N/A
Dataset	322_MRP1i10													Dataset	Thiol (Dataset_2)
Algorithm	RINH								5 folds Cross-Validation		Leave-One-Out			Algorithm	RINH								5 folds Cross-Validation		Leave-One-Out
Kernel	Density		Distance-TN		Distance-NH		Distance-NHC							Kernel	Density		Distance-TN		Distance-NH		Distance-NHC
Function	LTN	GTN	LTN	GTN	LTN	GTN	LTN	GTN	Linear SVM	Random Forest	Linear SVM	Random Forest		Function	LTN	GTN	LTN	GTN	LTN	GTN	LTN	GTN	Linear SVM	Random Forest	Linear SVM	Random Forest
Modelability = 0.79														Modelability = 0.77
Molecules														Molecules
Class 0	201	201	201	201	201	201	201	201	201	201	201	201		Class 0	245	245	245	245	245	245	245	245	245	245	245	245
Class 1	225	225	225	225	225	225	225	225	225	225	225	225		Class 1	196	196	196	196	196	196	196	196	196	196	196	196
All	426	426	426	426	426	426	426	426	426	426	426	426		All	441	441	441	441	441	441	441	441	441	441	441	441
True Predicted														True Predicted
Class 0	193	158	178	171	178	169	178	167	169	167	169	168		Class 0	233	190	212	198	210	199	216	158	200	206	199	206
Class 1	213	181	197	181	197	182	204	171	175	188	178	187		Class 1	175	144	152	146	158	145	169	152	150	133	149	135
All	406	339	375	352	375	351	382	338	344	355	347	355		All	408	334	364	344	368	344	385	310	350	339	348	341
Statistic Parameters														Statistic Parameters
Accuracy	0.9531	0.7958	0.8803	0.8263	0.8803	0.8239	0.8967	0.7934	0.8075	0.8333	0.8146	0.8333		Accuracy	0.9252	0.7574	0.8254	0.78	0.8345	0.78	0.873	0.7029	0.7937	0.7687	0.7891	0.7732
Sensitivity	0.9467	0.8044	0.8756	0.8044	0.8756	0.8089	0.9067	0.76	0.7778	0.8356	0.7911	0.8311		Sensitivity	0.8929	0.7347	0.7755	0.7449	0.8061	0.7398	0.8622	0.7755	0.7653	0.6786	0.7602	0.6888
Specificity	0.9602	0.7861	0.8856	0.8507	0.8856	0.8408	0.8856	0.8308	0.8408	0.8308	0.8408	0.8358		Specificity	0.951	0.7755	0.8653	0.8082	0.8571	0.8122	0.8816	0.6449	0.8163	0.8408	0.8122	0.8408
CCR	0.9534	0.7953	0.8806	0.8276	0.8806	0.8248	0.8961	0.7954	0.8093	0.8332	0.816	0.8335		CCR	0.9219	0.7551	0.8204	0.7765	0.8316	0.776	0.8719	0.7102	0.7908	0.7597	0.7862	0.7648
MCC	0.9061	0.5904	0.7603	0.6542	0.7603	0.6487	0.7927	0.5903	0.6178	0.6659	0.631	0.6662		MCC	0.8485	0.5095	0.6453	0.554	0.6643	0.5536	0.7432	0.4193	0.5819	0.5291	0.5727	0.5384
Kappa	0.9059	0.5904	0.7601	0.6528	0.7601	0.6478	0.7927	0.5877	0.6156	0.6659	0.6294	0.666		Kappa	0.8478	0.5094	0.6444	0.5539	0.6643	0.5535	0.7431	0.4114	0.5819	0.5258	0.5727	0.5356
Youden	0.9069	0.5905	0.7611	0.9552	0.7611	0.6497	0.7922	0.5908	0.618	0.6664	0.6319	0.6669		Youden	0.8439	0.5102	0.6408	0.5531	0.6633	0.552	0.7439	0.4204	0.5816	0.5194	0.5724	0.5296
Geometric Mean	0.9534	0.7952	0.8805	0.8273	0.8805	0.8247	0.8961	0.7946	0.8087	0.8332	0.8156	0.8335		Geometric Mean	0.9215	0.7548	0.8192	0.7759	0.8312	0.7752	0.8719	0.7072	0.7904	0.7554	0.7858	0.761
auROC	0.9809	0.9575	0.9598	0.9251	0.9611	0.9248	0.9544	0.9229	0.8753	0.9208	0.8767	0.9077		auROC	0.9681	0.9334	0.9409	0.92	0.9337	0.9115	0.9321	0.8957	0.8722	0.8634	0.8674	0.8678
Reliability	0.8237	0.965	0.9368	0.9786	0.9369	0.9864	0.8934	0.9764	N/A	N/A	N/A	N/A		Reliability	0.8122	0.9621	0.9585	0.9866	0.9545	0.9867	0.8876	0.9653	N/A	N/A	N/A	N/A
Dataset	RET													Dataset	313_MDR1
Algorithm	RINH								5 folds Cross-Validation		Leave-One-Out			Algorithm	RINH								5 folds Cross-Validation		Leave-One-Out
Kernel	Density		Distance-TN		Distance-NH		Distance-NHC							Kernel	Density		Distance-TN		Distance-NH		Distance-NHC
Function	LTN	GTN	LTN	GTN	LTN	GTN	LTN	GTN	Linear SVM	Random Forest	Linear SVM	Random Forest		Function	LTN	GTN	LTN	GTN	LTN	GTN	LTN	GTN	Linear SVM	Random Forest	Linear SVM	Random Forest
Modelability = 0.93														Modelability = 0.67
Molecules														Molecules
Class 0	427	427	427	427	427	427	427	427	427	427	427	427		Class 0	260	260	260	260	260	260	260	260	260	260	260	260
Class 1	391	391	391	391	391	391	391	391	391	391	391	391		Class 1	307	307	307	307	307	307	307	307	307	307	307	307
All	818	818	818	818	818	818	818	818	818	818	818	818		All	567	567	567	567	567	567	567	567	567	567	567	567
True Predicted														True Predicted
Class 0	420	407	411	406	412	400	408	393	392	402	388	404		Class 0	214	176	190	178	198	179	208	185	182	177	173	183
Class 1	380	334	374	365	376	366	377	365	357	356	359	356		Class 1	281	230	240	223	232	217	243	207	236	235	240	232
All	800	741	785	771	788	766	785	758	749	758	747	760		All	495	406	430	401	430	396	451	392	418	412	413	415
Statistic Parameters														Statistic Parameters
Accuracy	0.978	0.9059	0.9597	0.9425	0.9633	0.9364	0.9597	0.9267	0.9156	0.9267	0.9132	0.9291		Accuracy	0.873	0.716	0.7584	0.7072	0.7584	0.6984	0.7954	0.6914	0.7372	0.7266	0.7284	0.7319
Sensitivity	0.9719	0.8542	0.9565	0.9335	0.9616	0.9361	0.9642	0.9335	0.913	0.9105	0.9182	0.9105		Sensitivity	0.9153	0.7492	0.7818	0.7264	0.7557	0.7068	0.7915	0.6743	0.7687	0.7655	0.7818	0.7557
Specificity	0.9836	0.9532	0.9625	0.9508	0.9649	0.9368	0.9555	0.9204	0.918	0.9415	0.9087	0.9461		Specificity	0.8231	0.6769	0.7308	0.6846	0.7615	0.6885	0.8	0.7115	0.7	0.6808	0.6654	0.7038
CCR	0.9777	0.9037	0.9595	0.9422	0.9633	0.9364	0.9598	0.9269	0.8155	0.926	0.9134	0.9283		CCR	0.8692	0.7131	0.7563	0.7055	0.7586	0.6977	0.7958	0.6929	0.7344	0.7231	0.7236	0.7298
MCC	0.9559	0.814	0.9192	0.8849	0.9265	0.8727	0.9193	0.8533	0.831	0.8531	0.8263	0.8581		MCC	0.7447	0.4271	0.513	0.4108	0.5158	0.3945	0.59	0.3845	0.4698	0.448	0.4509	0.4598
Kappa	0.9559	0.8106	0.9192	0.8848	0.9265	0.8726	0.9192	0.8531	0.831	0.8529	0.8262	0.8577		Kappa	0.7428	0.427	0.513	0.4108	0.5153	0.3943	0.5894	0.383	0.4697	0.4477	0.4498	0.4598
Youden	0.9555	0.8074	0.9191	0.8843	0.9265	0.8728	0.9197	0.8539	0.8311	0.8519	0.8268	0.8566		Youden	0.7384	0.4261	0.5125	0.411	0.5172	0.3953	0.5915	0.3858	0.4687	0.4462	0.4471	0.4595
Geometric Mean	0.9777	0.9023	0.9595	0.9421	0.9633	0.9364	0.9598	0.9269	0.9155	0.9258	0.9134	0.9281		Geometric Mean	0.868	0.7121	0.7558	0.7052	0.7586	0.6976	0.7958	0.6927	0.7336	0.7219	0.7212	0.7293
auROC	0.9947	0.9844	0.991	0.979	0.9913	0.9733	0.9899	0.9695	0.9617	0.9805	0.9619	0.9809		auROC	0.8941	0.8673	0.8609	0.8487	0.889	0.8455	0.892	0.852	0.7761	0.7791	0.7767	0.782
Reliability	0.9112	0.9885	0.9744	0.9918	0.9775	0.9893	0.9648	0.9944	N/A	N/A	N/A	N/A		Reliability	0.84	0.9732	0.9591	0.9956	0.9608	0.9867	0.9332	0.9909	N/A	N/A	N/A	N/A
Dataset	TEK													Dataset	AURKB
Algorithm	RINH								5 folds Cross-Validation		Leave-One-Out			Algorithm	RINH								5 folds Cross-Validation		Leave-One-Out
Kernel	Density		Distance-TN		Distance-NH		Distance-NHC							Kernel	Density		Distance-TN		Distance-NH		Distance-NHC
Function	LTN	GTN	LTN	GTN	LTN	GTN	LTN	GTN	Linear SVM	Random Forest	Linear SVM	Random Forest		Function	LTN	GTN	LTN	GTN	LTN	GTN	LTN	GTN	Linear SVM	Random Forest	Linear SVM	Random Forest
Modelability = 0.93														Modelability = 0.91
Molecules														Molecules
Class 0	340	340	340	340	340	340	340	340	340	340	340	340		Class 0	385	385	385	385	385	385	385	385	385	385	385	385
Class 1	345	345	345	345	345	345	345	345	345	345	345	345		Class 1	358	358	358	358	358	358	358	358	358	358	358	358
All	685	685	685	685	685	685	685	685	685	685	685	685		All	743	743	743	743	743	743	743	743	743	743	743	743
True Predicted														True Predicted
Class 0	332	312	326	316	327	318	330	316	308	317	306	319		Class 0	370	341	359	353	361	353	365	351	337	350	340	356
Class 1	341	337	336	333	336	331	339	332	334	324	333	329		Class 1	351	330	342	338	341	337	345	337	335	323	337	333
All	673	649	662	649	663	649	669	648	642	641	639	648		All	721	671	701	691	702	690	710	688	672	673	677	689
Statistic Parameters														Statistic Parameters
Accuracy	0.9825	0.9474	0.9664	0.9474	0.9679	0.9474	0.9766	0.946	0.9372	0.9358	0.9328	0.946		Accuracy	0.9704	0.9031	0.9435	0.93	0.9448	0.9287	0.9556	0.926	0.9044	0.9058	0.9112	0.9273
Sensitivity	0.9884	0.9768	0.9739	0.9652	0.9739	0.9594	0.9826	0.9623	0.9681	0.9391	0.9652	0.9536		Sensitivity	0.9804	0.9218	0.9553	0.9441	0.9525	0.9413	0.9637	0.9413	0.9358	0.9022	0.9413	0.9302
Specificity	0.9765	0.9176	0.9588	0.9294	0.9618	0.9353	0.9706	0.9294	0.9059	0.9324	0.9	0.9382		Specificity	0.961	0.8857	0.9325	0.9169	0.9377	0.9169	0.9481	0.9117	0.8753	0.9091	0.8831	0.9247
CCR	0.9824	0.9472	0.9664	0.9473	0.9678	0.9474	0.9766	0.9459	0.937	0.9357	0.9326	0.9459		CCR	0.9707	0.9038	0.9439	0.9305	0.9451	0.9291	0.9559	0.9265	0.9055	0.9057	0.9122	0.9274
MCC	0.965	0.8964	0.9329	0.8954	0.9358	0.8951	0.9533	0.8924	0.876	0.8715	0.8674	0.892		MCC	0.941	0.807	0.8872	0.8605	0.8897	0.8577	0.9113	0.8525	0.8109	0.8113	0.8242	0.8546
Kappa	0.965	0.8948	0.9328	0.8949	0.9358	0.8949	0.9533	0.8919	0.8744	0.8715	0.8656	0.892		Kappa	0.9407	0.8062	0.8869	0.86	0.8896	0.8573	0.9111	0.8519	0.8091	0.8113	0.8225	0.8545
Youden	0.9649	0.8945	0.9327	0.8946	0.9357	0.8947	0.9532	0.8917	0.874	0.8715	0.8652	0.8919		Youden	0.9415	0.8075	0.8878	0.861	0.8902	0.8582	0.9117	0.853	0.8111	0.8113	0.8245	0.8548
Geometric Mean	0.9824	0.9468	0.9663	0.9471	0.9678	0.9473	0.9766	0.9457	0.9365	0.9357	0.932	0.9459		Geometric Mean	0.9707	0.9036	0.9438	0.9304	0.9451	0.929	0.9558	0.9264	0.905	0.9057	0.9118	0.9274
auROC	0.995	0.9806	0.9935	0.9786	0.9935	0.9792	0.9937	0.9802	0.9688	0.9777	0.9684	0.9833		auROC	0.9804	0.9643	0.9777	0.9639	0.9778	0.9627	0.9779	0.9671	0.9413	0.9589	0.9491	0.9723
Reliability	0.9557	0.9903	0.9795	0.9963	0.981	0.9975	0.9853	0.9921	N/A	N/A	N/A	N/A		Reliability	0.9253	0.9837	0.9853	0.9974	0.9834	0.9971	0.9673	0.9934	N/A	N/A	N/A	N/A
Dataset	243_BSEPi10													Dataset	SYK
Algorithm	RINH								5 folds Cross-Validation		Leave-One-Out			Algorithm	RINH								5 folds Cross-Validation		Leave-One-Out
Kernel	Density		Distance-TN		Distance-NH		Distance-NHC							Kernel	Density		Distance-TN		Distance-NH		Distance-NHC
Function	LTN	GTN	LTN	GTN	LTN	GTN	LTN	GTN	Linear SVM	Random Forest	Linear SVM	Random Forest		Function	LTN	GTN	LTN	GTN	LTN	GTN	LTN	GTN	Linear SVM	Random Forest	Linear SVM	Random Forest
Modelability = 0.81														Modelability = 0.88
Molecules														Molecules
Class 0	422	422	422	422	422	422	422	422	422	422	422	422		Class 0	410	410	410	410	410	410	410	410	410	410	410	410
Class 1	303	303	303	303	303	303	303	303	303	303	303	303		Class 1	405	405	405	405	405	405	405	405	405	405	405	405
All	725	725	725	725	725	725	725	725	725	725	725	725		All	815	815	815	815	815	815	815	815	815	815	815	815
True Predicted														True Predicted
Class 0	415	373	394	372	378	360	398	368	364	373	367	364		Class 0	386	335	366	349	368	356	372	338	352	379	351	379
Class 1	262	209	242	229	249	235	246	195	242	241	246	240		Class 1	400	380	382	372	380	371	388	376	363	359	364	371
All	677	582	636	601	627	595	644	563	606	614	613	604		All	786	715	748	721	748	727	760	716	715	738	715	750
Statistic Parameters														Statistic Parameters
Accuracy	0.9338	0.8028	0.8772	0.829	0.8648	0.8207	0.8883	0.7766	0.8359	0.8469	0.8455	0.8331		Accuracy	0.9644	0.8773	0.9178	0.8847	0.9178	0.892	0.9325	0.8785	0.8773	0.9055	0.8773	0.9202
Sensitivity	0.8647	0.6898	0.7987	0.7558	0.8218	0.7756	0.8119	0.6436	0.7987	0.7954	0.8119	0.7921		Sensitivity	0.9877	0.9383	0.9432	0.9185	0.9383	0.916	0.958	0.9333	0.8963	0.8864	0.8988	0.916
Specificity	0.9834	0.8839	0.9336	0.8815	0.8957	0.8531	0.9431	0.872	0.8626	0.8839	0.8697	0.8626		Specificity	0.9415	0.8171	0.8927	0.8512	0.8976	0.8683	0.9073	0.8244	0.8585	0.9244	0.8561	0.9244
CCR	0.924	0.7868	0.8662	0.8186	0.8588	0.8143	0.8775	0.7578	0.8306	0.8396	0.8408	0.8273		CCR	0.9646	0.8777	0.9179	0.8849	0.9179	0.8922	0.9327	0.8789	0.8774	0.9054	0.8774	0.9202
MCC	0.8659	0.591	0.7471	0.646	0.7212	0.6305	0.7703	0.5355	0.6622	0.6839	0.6822	0.6562		MCC	0.9299	0.7605	0.8367	0.7712	0.8363	0.7851	0.8662	0.7619	0.7552	0.8115	0.7554	0.8405
Kappa	0.8617	0.5859	0.7438	0.6445	0.7209	0.6304	0.7668	0.5289	0.6622	0.6834	0.6822	0.6562		Kappa	0.9289	0.7548	0.8356	0.7694	0.8356	0.7841	0.8651	0.7572	0.7547	0.811	0.7547	0.8405
Youden	0.8481	0.5737	0.7323	0.6373	0.7175	0.6287	0.755	0.5156	0.6612	0.6793	0.6815	0.6546		Youden	0.9291	0.7553	0.8359	0.8512	0.8358	0.7843	0.8653	0.7577	0.7548	0.8108	0.7549	0.8404
Geometric Mean	0.9221	0.7808	0.8635	0.8162	0.858	0.8134	0.875	0.7491	0.83	0.8385	0.8403	0.8266		Geometric Mean	0.9643	0.8756	0.9176	0.8842	0.9177	0.8919	0.9323	0.8772	0.8772	0.9052	0.8772	0.9202
auROC	0.9886	0.9593	0.9681	0.9443	0.9578	0.9314	0.9684	0.9351	0.9149	0.9071	0.9144	0.8978		auROC	0.9846	0.9572	0.9797	0.9376	0.9805	0.9383	0.9795	0.938	0.9425	0.9751	0.9439	0.9786
Reliability	0.8552	0.9643	0.9584	0.987	0.97	0.9884	0.9141	0.979	N/A	N/A	N/A	N/A		Reliability	0.8869	0.9792	0.9687	0.9929	0.9763	0.9939	0.97	0.9885	N/A	N/A	N/A	N/A
Dataset	323_MRP2													Dataset	YES1
Algorithm	RINH								5 folds Cross-Validation		Leave-One-Out			Algorithm	RINH								5 folds Cross-Validation		Leave-One-Out
Kernel	Density		Distance-TN		Distance-NH		Distance-NHC							Kernel	Density		Distance-TN		Distance-NH		Distance-NHC
Function	LTN	GTN	LTN	GTN	LTN	GTN	LTN	GTN	Linear SVM	Random Forest	Linear SVM	Random Forest		Function	LTN	GTN	LTN	GTN	LTN	GTN	LTN	GTN	Linear SVM	Random Forest	Linear SVM	Random Forest
Modelability = 0.78														Modelability = 0.91
Molecules														Molecules
Class 0	94	94	94	94	94	94	94	94	94	94	94	94		Class 0	62	62	62	62	62	62	62	62	62	62	62	62
Class 1	128	128	128	128	128	128	128	128	128	128	128	128		Class 1	62	62	62	62	62	62	62	62	62	62	62	62
All	222	222	222	222	222	222	222	222	222	222	222	222		All	124	124	124	124	124	124	124	124	124	124	124	124
True Predicted														True Predicted
Class 0	83	74	75	72	78	67	79	68	81	80	78	74		Class 0	56	53	55	55	56	55	58	56	54	56	54	56
Class 1	118	106	108	104	107	103	108	96	101	100	99	108		Class 1	61	61	61	61	61	59	62	60	60	59	58	57
All	201	180	183	176	185	170	187	164	182	180	177	182		All	117	114	116	116	117	114	120	116	114	115	112	113
Statistic Parameters														Statistic Parameters
Accuracy	0.9054	0.8108	0.8243	0.7928	0.8333	0.7658	0.8423	0.7387	0.8198	0.8108	0.7973	0.8198		Accuracy	0.9435	0.9194	0.9355	0.9355	0.9435	0.9194	0.9677	0.9355	0.9194	0.9274	0.9032	0.9113
Sensitivity	0.9219	0.8281	0.8438	0.8125	0.8359	0.8047	0.8438	0.75	0.7891	0.7813	0.7734	0.8438		Sensitivity	0.9839	0.9839	0.9839	0.9839	0.9839	0.9516	1	0.9677	0.9677	0.9516	0.9355	0.9194
Specificity	0.883	0.7872	0.7979	0.766	0.8298	0.7128	0.8404	0.7234	0.8617	0.8511	0.8298	0.7872		Specificity	0.9032	0.8548	0.8871	0.8871	0.9032	0.8871	0.9355	0.9032	0.871	0.9032	0.871	0.9032
CCR	0.9024	0.8077	0.8208	0.7892	0.8329	0.7587	0.8421	0.7367	0.8254	0.8162	0.8016	0.8155		CCR	0.9435	0.9194	0.9355	0.9355	0.9435	0.9194	0.9677	0.9355	0.9194	0.9274	0.9032	0.9113
MCC	0.806	0.6137	0.6407	0.5769	0.6617	0.819	0.6801	0.4701	0.6433	0.6251	0.5965	0.631		MCC	0.89	0.8458	0.8751	0.8751	0.89	0.8405	0.9374	0.8728	0.8427	0.8558	0.8081	0.8227
Kappa	0.806	0.6136	0.6407	0.5768	0.6611	0.8189	0.6794	0.4694	0.6381	0.62	0.5923	0.631		Kappa	0.8871	0.8387	0.871	0.871	0.8871	0.8387	0.9355	0.871	0.8387	0.8548	0.8065	0.8226
Youden	0.8049	0.6154	0.6416	0.5785	0.6657	0.8175	0.6842	0.4734	0.6508	0.6323	0.6032	0.631		Youden	0.8871	0.8387	0.871	0.871	0.8871	0.8387	0.9355	0.871	0.8387	0.8548	0.8065	0.8226
Geometric Mean	0.9022	0.8074	0.8205	0.7889	0.8329	0.7573	0.8421	0.7366	0.8246	0.8154	0.8011	0.815		Geometric Mean	0.9427	0.9171	0.9342	0.9342	0.9427	0.9188	0.9672	0.9349	0.9181	0.9271	0.9026	0.9113
auROC	0.9476	0.9181	0.9363	0.8876	0.9476	0.8667	0.939	0.8791	0.8526	0.8689	0.8596	0.8782		auROC	0.9899	0.94	0.9909	0.9408	0.9912	0.9417	0.9935	0.9493	0.9545	0.969	0.9501	0.9762
Reliability	0.8893	0.9877	0.9653	0.9896	0.9691	0.9929	0.9077	0.9707	N/A	N/A	N/A	N/A		Reliability	0.9667	0.9923	0.9967	0.9938	0.9918	0.9903	0.9634	0.9977	N/A	N/A	N/A	N/A
